# Supplementary material for: Base-Promoted Synthesis of β-Substituted-Tryptophans via a Simple and Convenient Three-Component Condensation of Nickel(II) Glycinate
Source: MDPI journal article supplement (doi:10.3390/molecules22050695), 2017-04-27

## Supplementary Materials

**Table S1.** Crystal data and structure refinement for **4a**

|                                             |                                                                                 |
|---------------------------------------------|---------------------------------------------------------------------------------|
| Empirical formula                           | C <sub>38</sub> H <sub>35</sub> Cl <sub>3</sub> N <sub>4</sub> NiO <sub>3</sub> |
| Formula weight                              | 760.74                                                                          |
| Temperature/K                               | 293.15                                                                          |
| Crystal system                              | triclinic                                                                       |
| Space group                                 | P-1                                                                             |
| a/Å                                         | 9.3484(3)                                                                       |
| b/Å                                         | 11.3583(4)                                                                      |
| c/Å                                         | 17.0360(6)                                                                      |
| α/°                                         | 87.8580(10)                                                                     |
| β/°                                         | 76.1330(10)                                                                     |
| γ/°                                         | 79.8190(10)                                                                     |
| Volume/Å <sup>3</sup>                       | 1728.52(10)                                                                     |
| Z                                           | 2                                                                               |
| ρ <sub>calc</sub> /cm <sup>3</sup>          | 1.462                                                                           |
| μ/mm <sup>-1</sup>                          | 3.300                                                                           |
| F(000)                                      | 788.0                                                                           |
| Radiation                                   | CuKα (λ = 1.54184)                                                              |
| 2θ range for data collection/°              | 10.698 to 136.618                                                               |
| Index ranges                                | -11 ≤ h ≤ 11, -13 ≤ k ≤ 13, -20 ≤ l ≤ 18                                        |
| Reflections collected                       | 47661                                                                           |
| Independent reflections                     | 6260 [R <sub>int</sub> = 0.0255, R <sub>sigma</sub> = 0.0160]                   |
| Data/restraints/parameters                  | 6260/0/452                                                                      |
| Goodness-of-fit on F <sup>2</sup>           | 1.039                                                                           |
| Final R indexes [I ≥ 2σ (I)]                | R <sub>1</sub> = 0.0483, wR <sub>2</sub> = 0.1221                               |
| Final R indexes [all data]                  | R <sub>1</sub> = 0.0492, wR <sub>2</sub> = 0.1228                               |
| Largest diff. peak/hole / e Å <sup>-3</sup> | 0.86/-0.88                                                                      |

**Figure S1** Crystal structure of **4a**

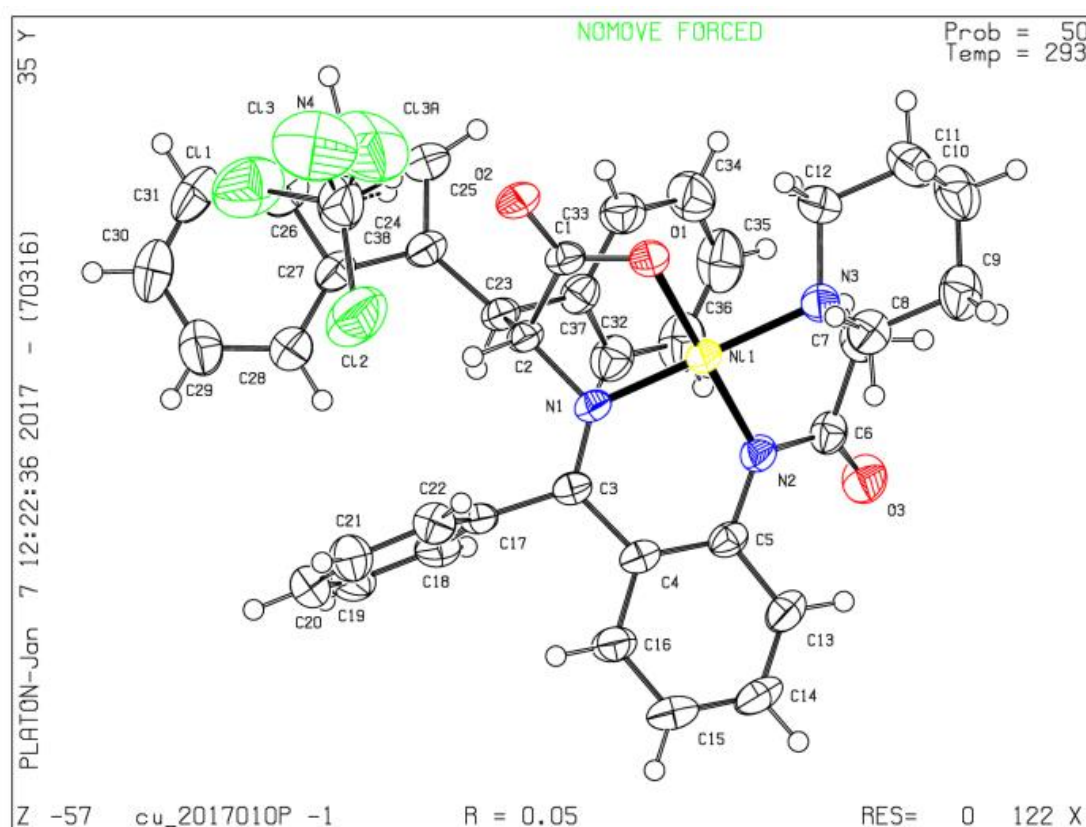

**Figure S2** Structures and NOE spectra of compound **4a** and **4j**

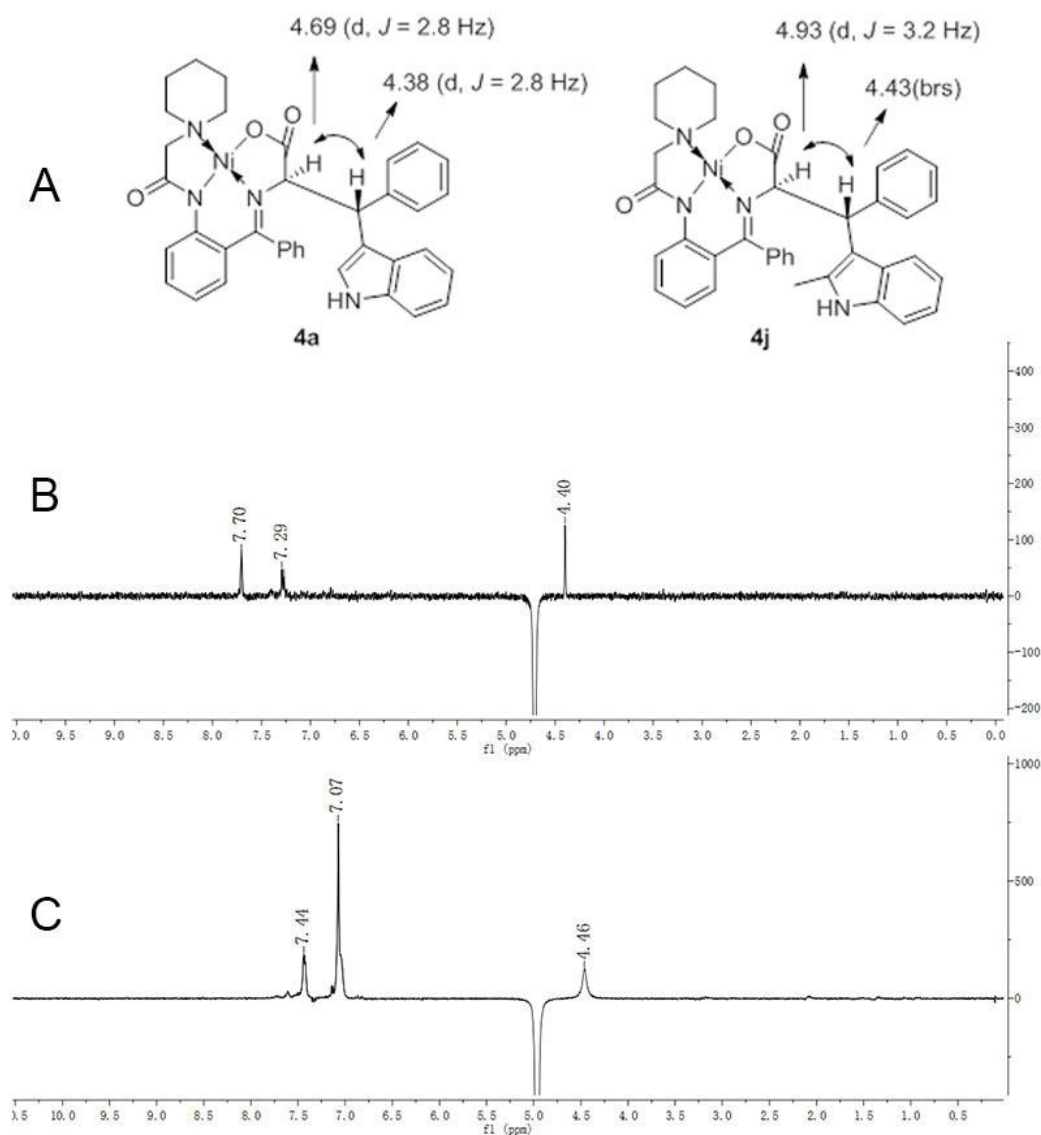

(A) Structures and related  $^1\text{H}$ NMR data of compound **4a** and **4j**. NOE spectra of **4a** (B) and **4j** (C) both show that the protons on the two chiral carbons correlate with each other. NOE spectrum of **4j** (C) indicates that the proton at 4.93 is not correlated with the methyl group in space.

## Copies of NMR spectra

### $^1\text{H}$ NMR spectrum of compound **4a**

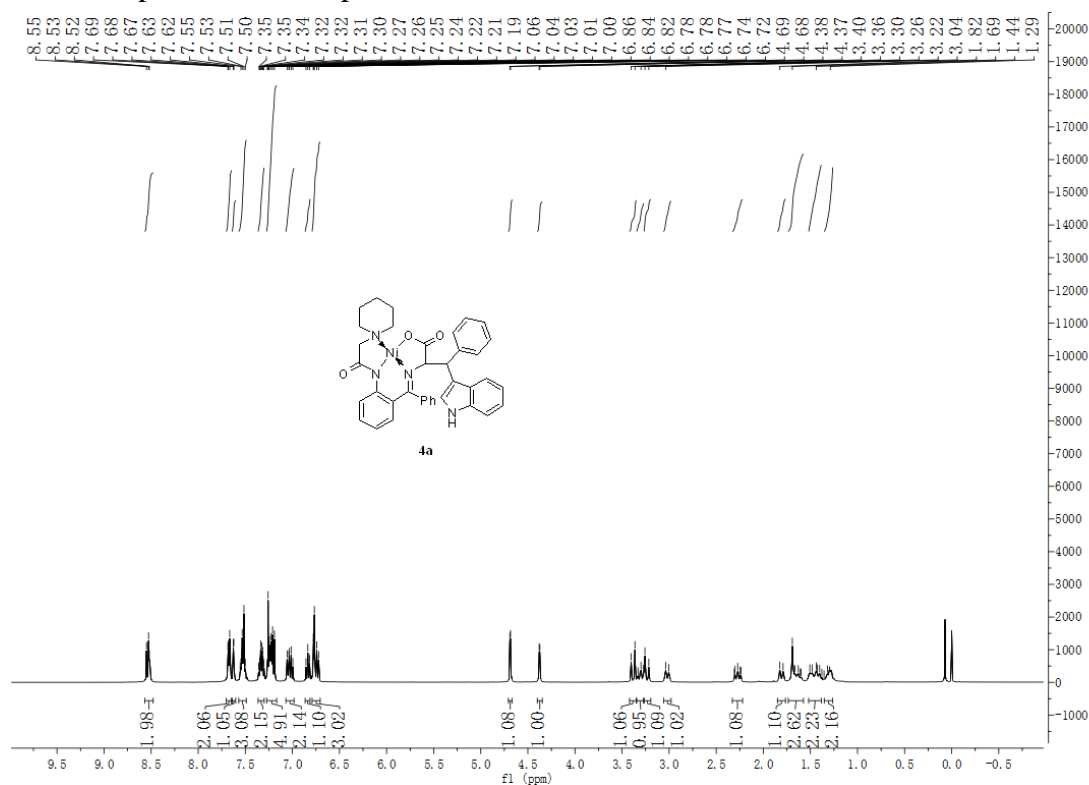

### $^{13}\text{C}$ NMR spectrum of compound **4a**

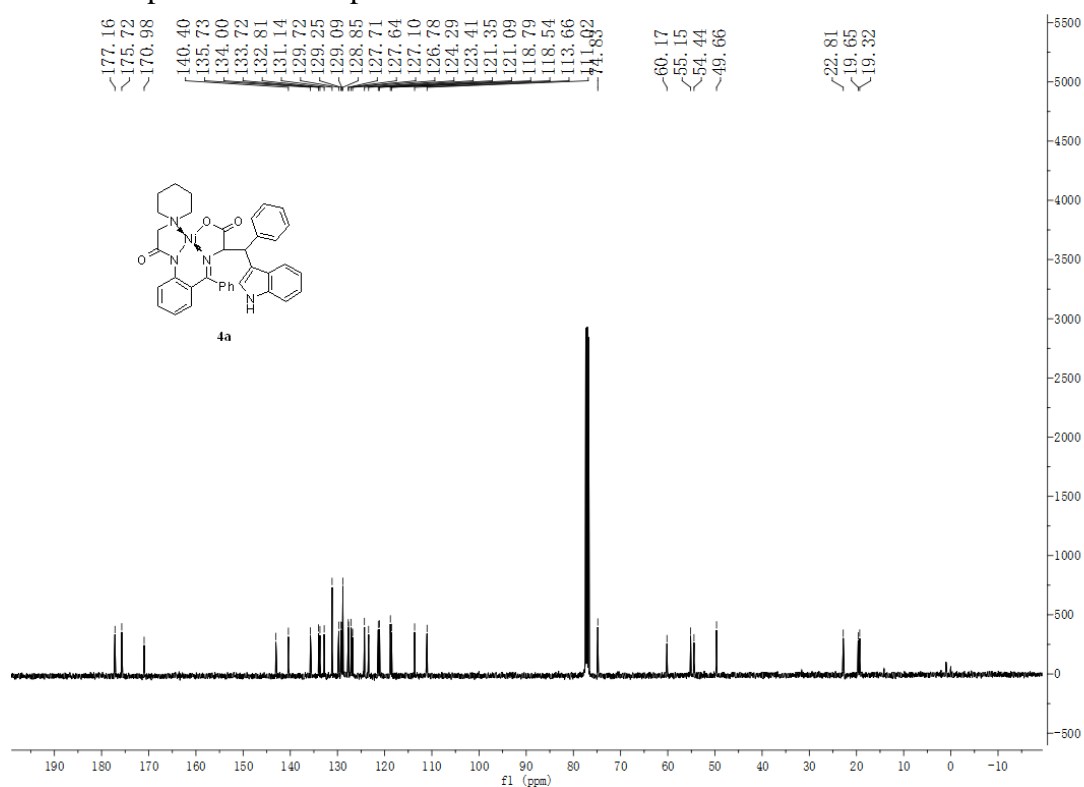

Chemical structure of compound **4b** is shown above the spectrum. The structure is a complex molecule featuring a benzimidazole core, a phenyl ring, a methoxy group, and a piperidine ring.

<sup>1</sup>H NMR spectrum (CDCl<sub>3</sub>) of compound **4b**. The x-axis represents the chemical shift in ppm, ranging from -1.0 to 9.5. The y-axis represents the intensity in arbitrary units, ranging from -2000 to 32000. The spectrum shows several peaks, with integration values provided below the baseline.

Integration values (from left to right): 1.96, 1.03, 1.09, 2.15, 4.89, 3.10, 2.07, 2.02, 1.04, 1.00, 3.02, 1.04, 2.02, 1.02, 1.05, 1.08, 2.05, 2.19, 1.91, 1.28.

**4b**

Chemical structure of **4b** is shown above the spectrum.

<sup>13</sup>C NMR spectrum (CDCl<sub>3</sub>) of compound **4b**. The x-axis represents the chemical shift in ppm (f1), ranging from -10 to 210. The y-axis represents the intensity. The spectrum shows several peaks, with the following chemical shifts (ppm) labeled above the peaks:

- 177.26
- 175.85
- 170.97
- 160.08
- 141.93
- 133.69
- 132.83
- 129.67
- 129.65
- 129.19
- 129.03
- 127.69
- 127.09
- 124.26
- 123.43
- 121.42
- 121.05
- 118.86
- 115.83
- 113.80
- 113.55
- 74.98
- 74.92
- 60.14
- 55.21
- 55.16
- 54.40
- 49.68
- 22.80
- 19.65
- 19.28

<sup>1</sup>HNMR spectrum of compound **4c**

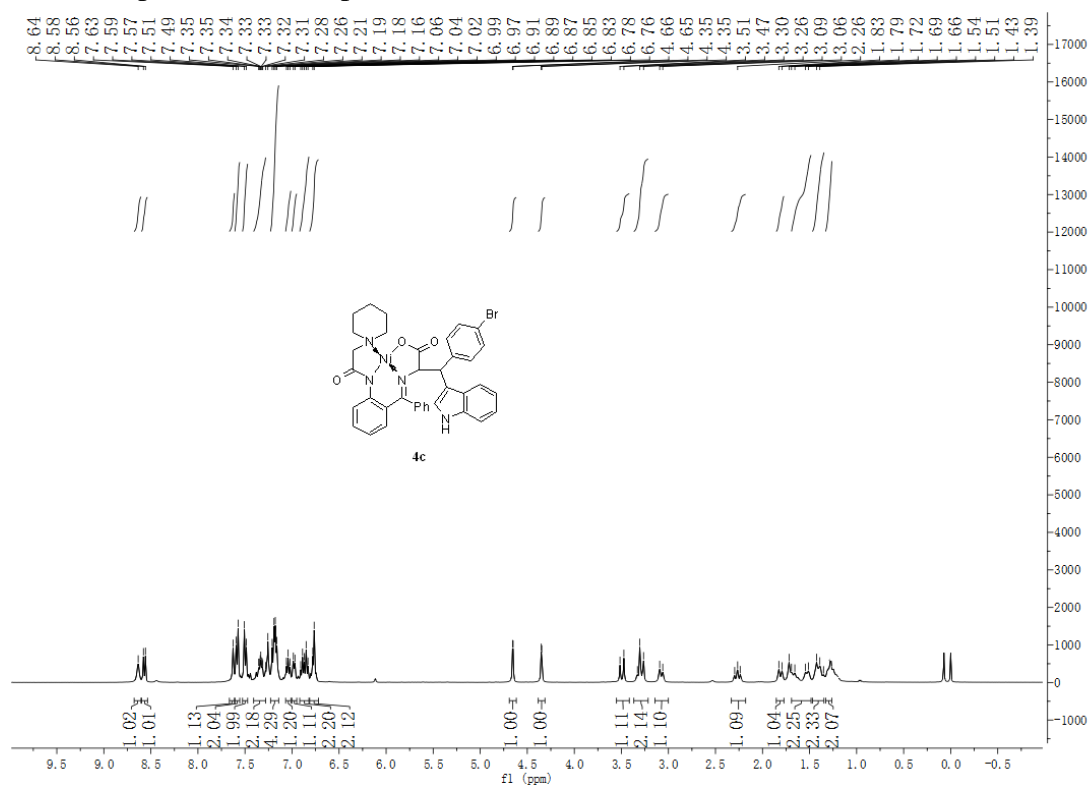

<sup>13</sup>CNMR spectrum of compound **4c**

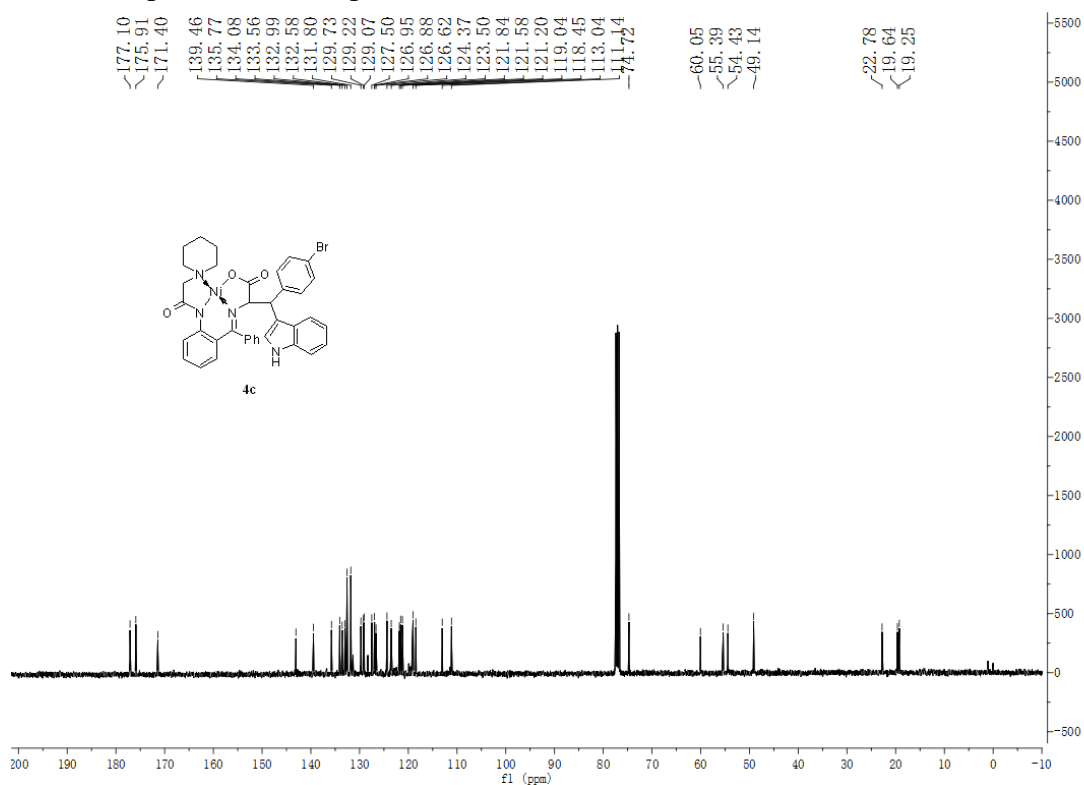

<sup>1</sup>HNMR spectrum of compound **4d**

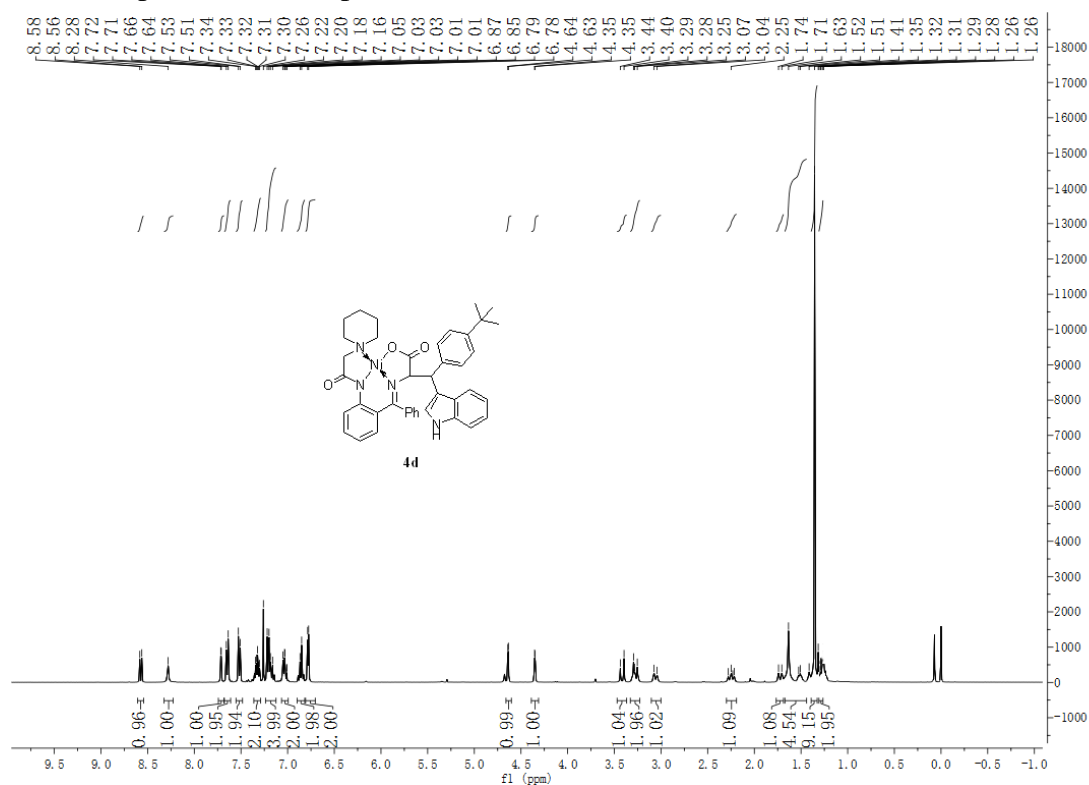

<sup>13</sup>CNMR spectrum of compound **4d**

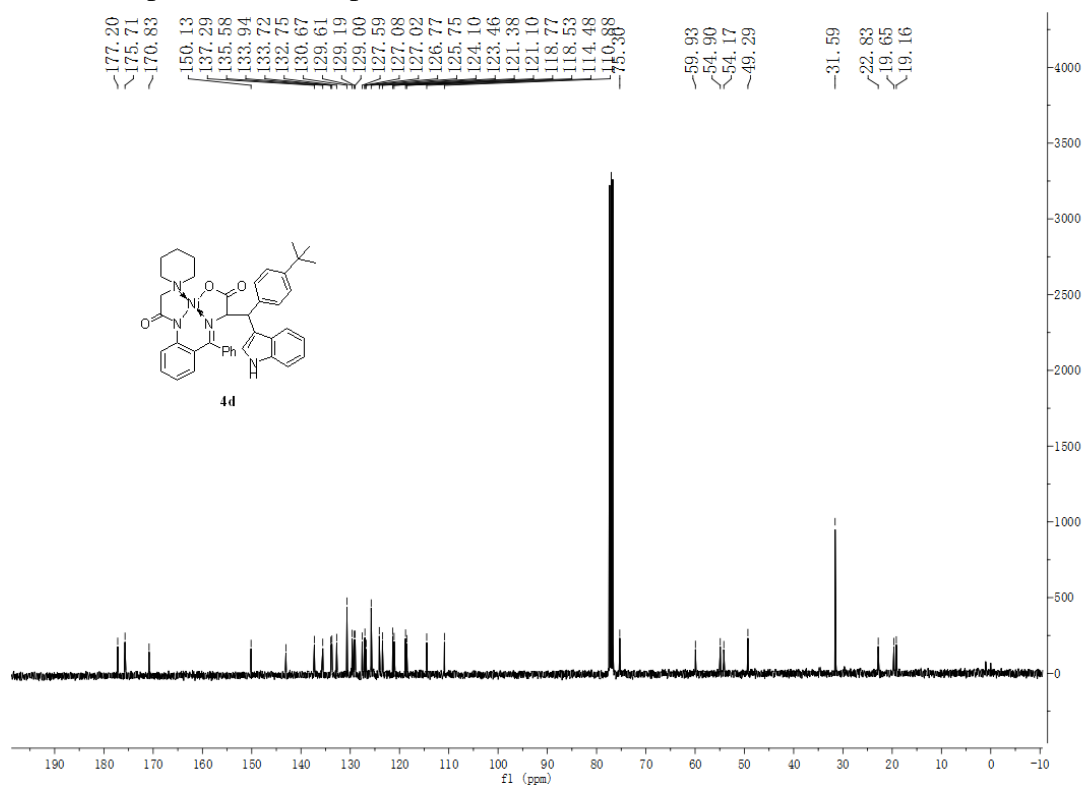

<sup>1</sup>HNMR spectrum of compound **4e**

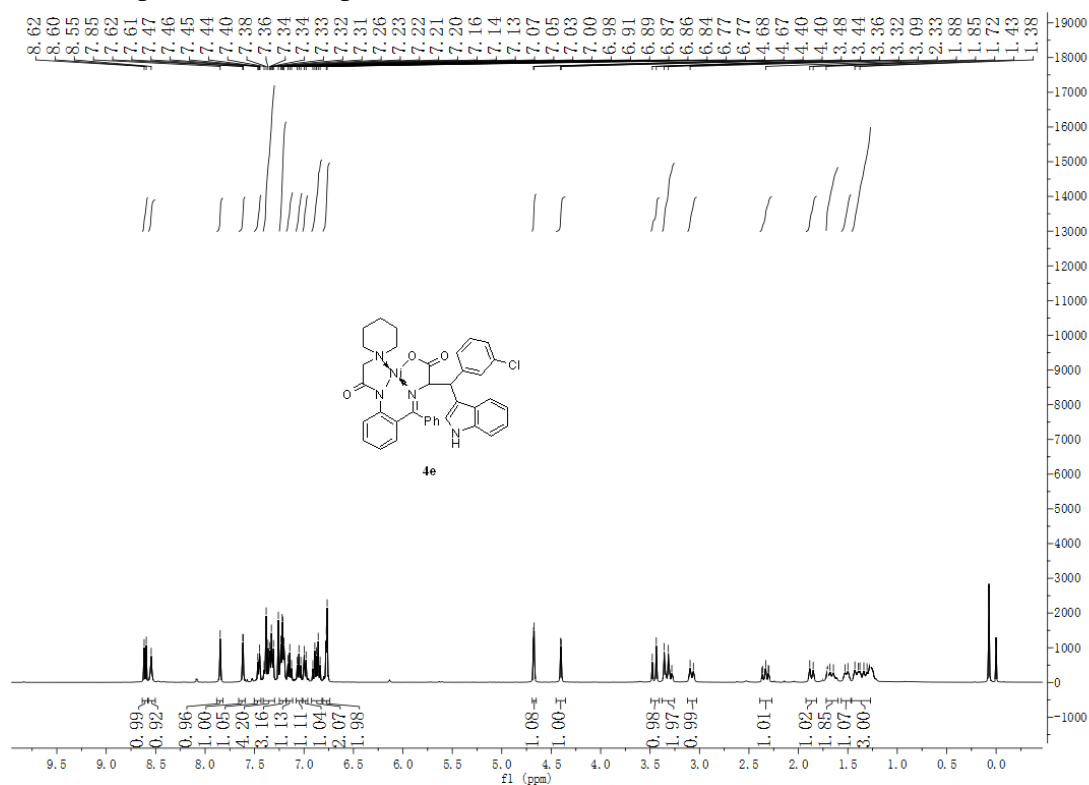

<sup>13</sup>CNMR spectrum of compound **4e**

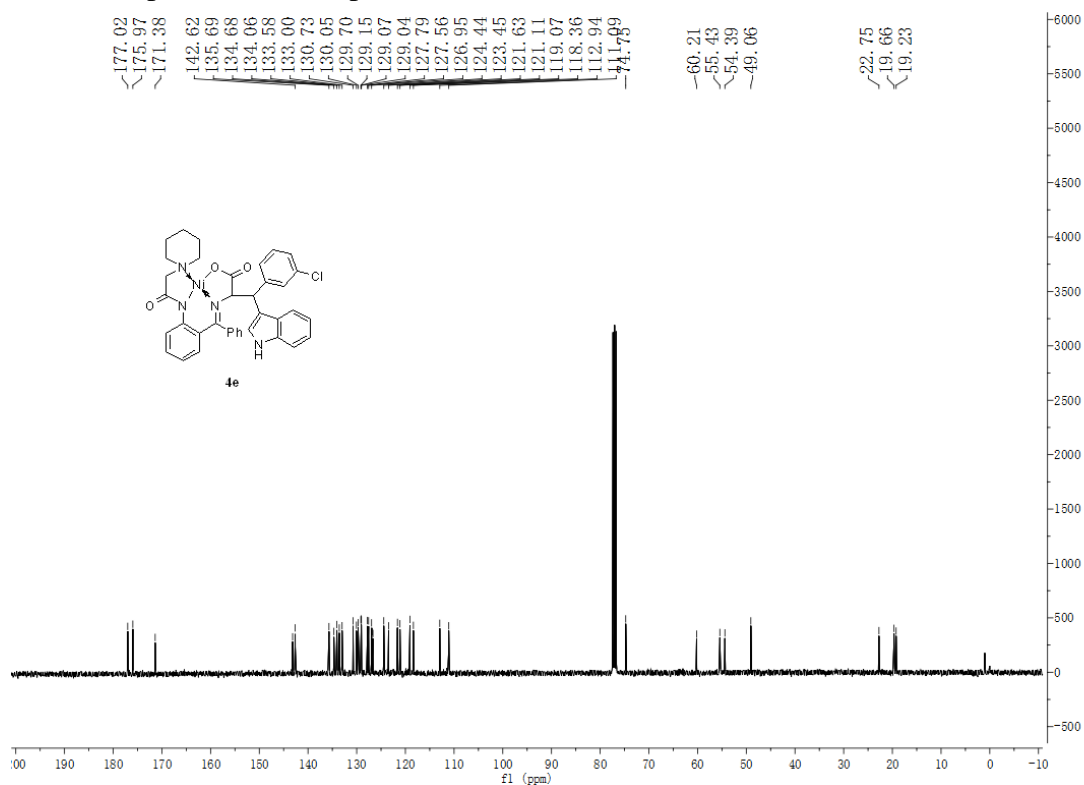



<sup>1</sup>HNMR spectrum of compound **4f**

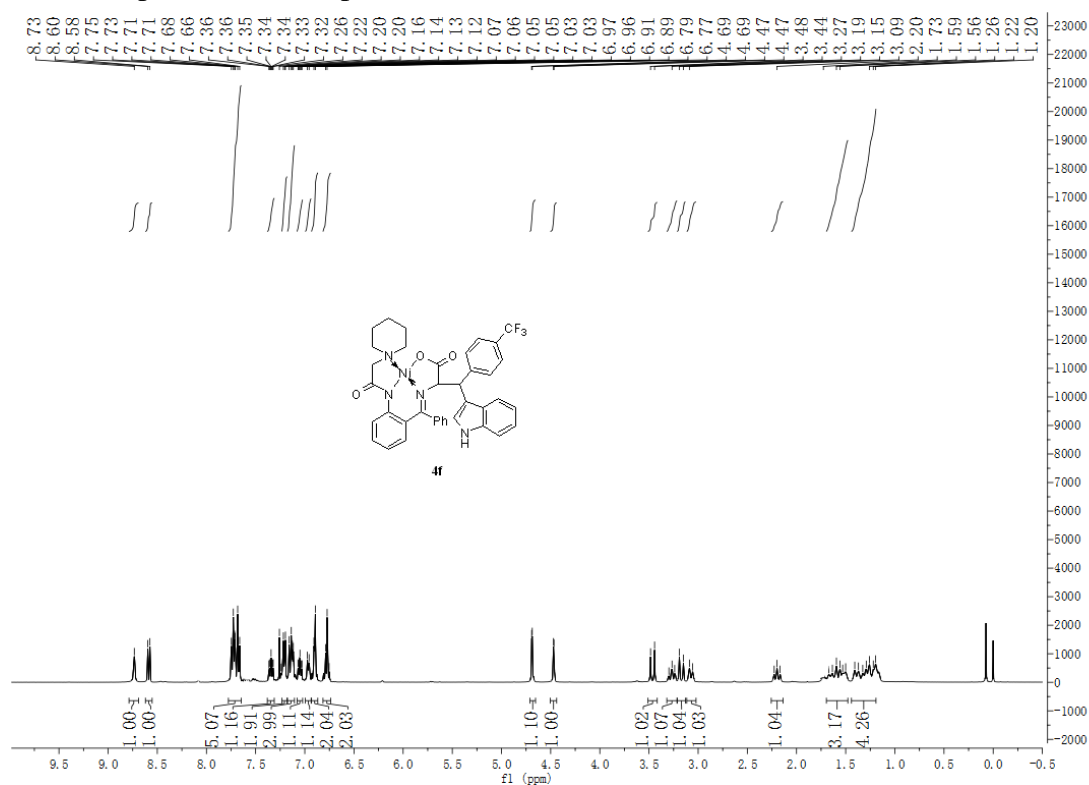

<sup>13</sup>CNMR spectrum of compound **4f**

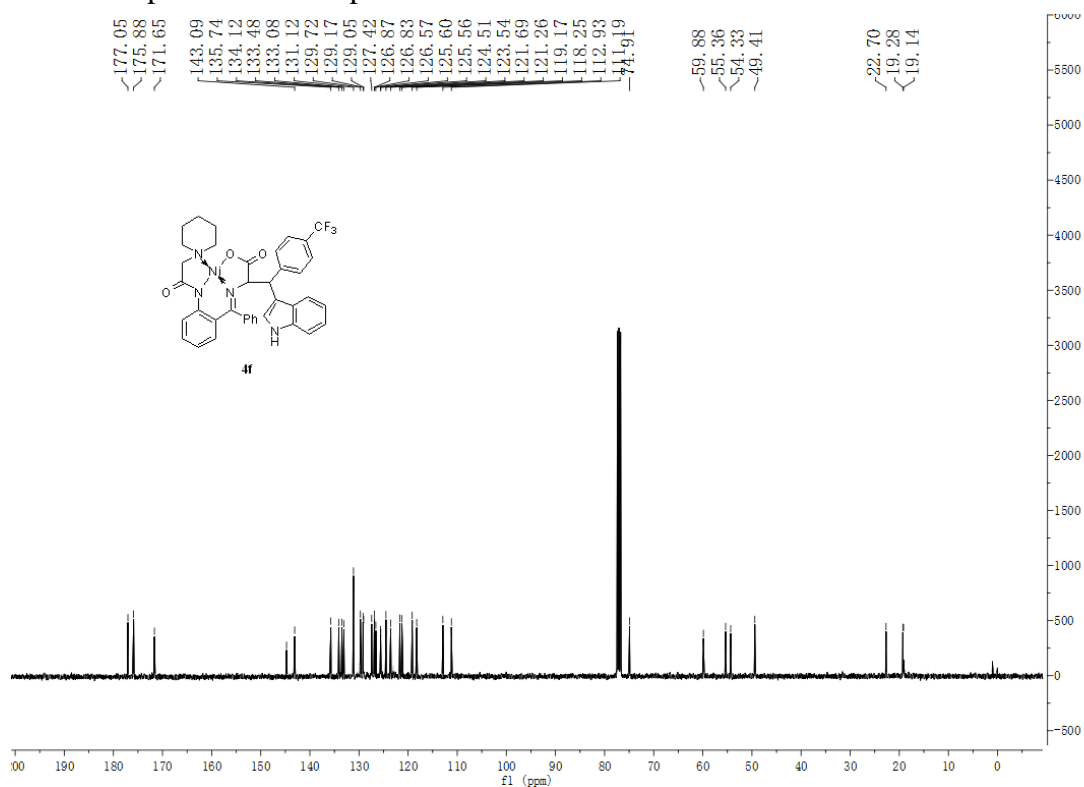

<sup>1</sup>HNMR spectrum of compound **4g**

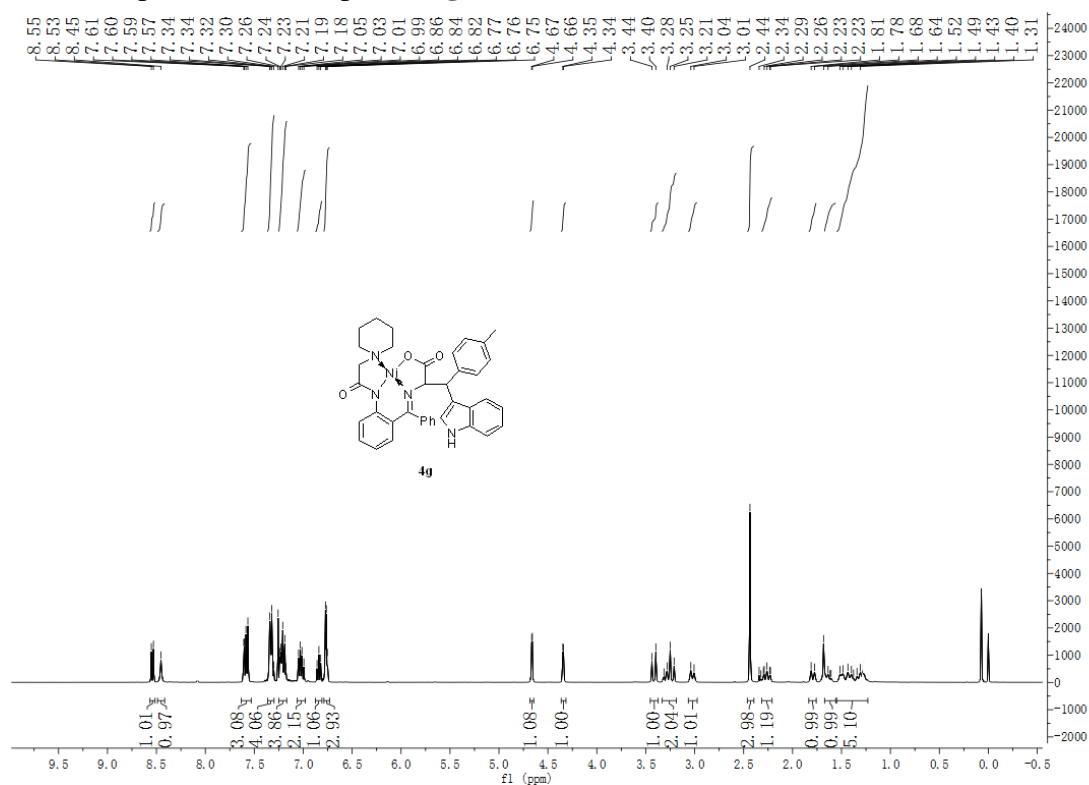

<sup>13</sup>CNMR spectrum of compound **4g**

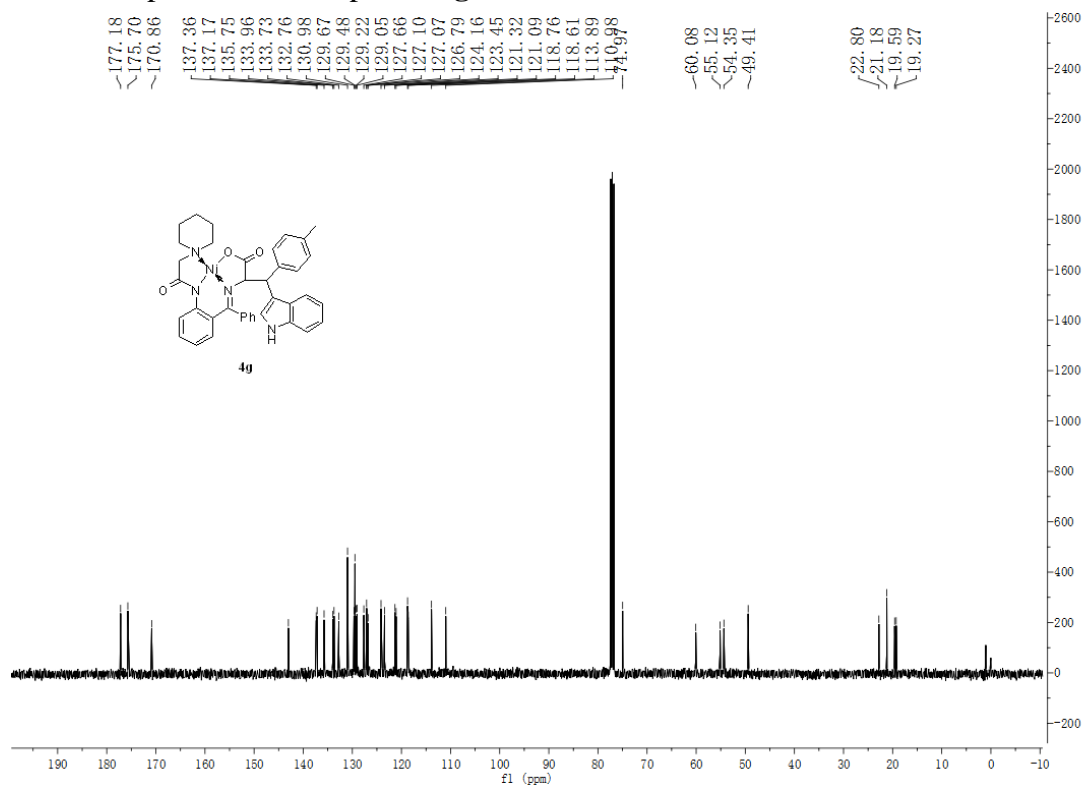

<sup>1</sup>H NMR spectrum of compound **4h**

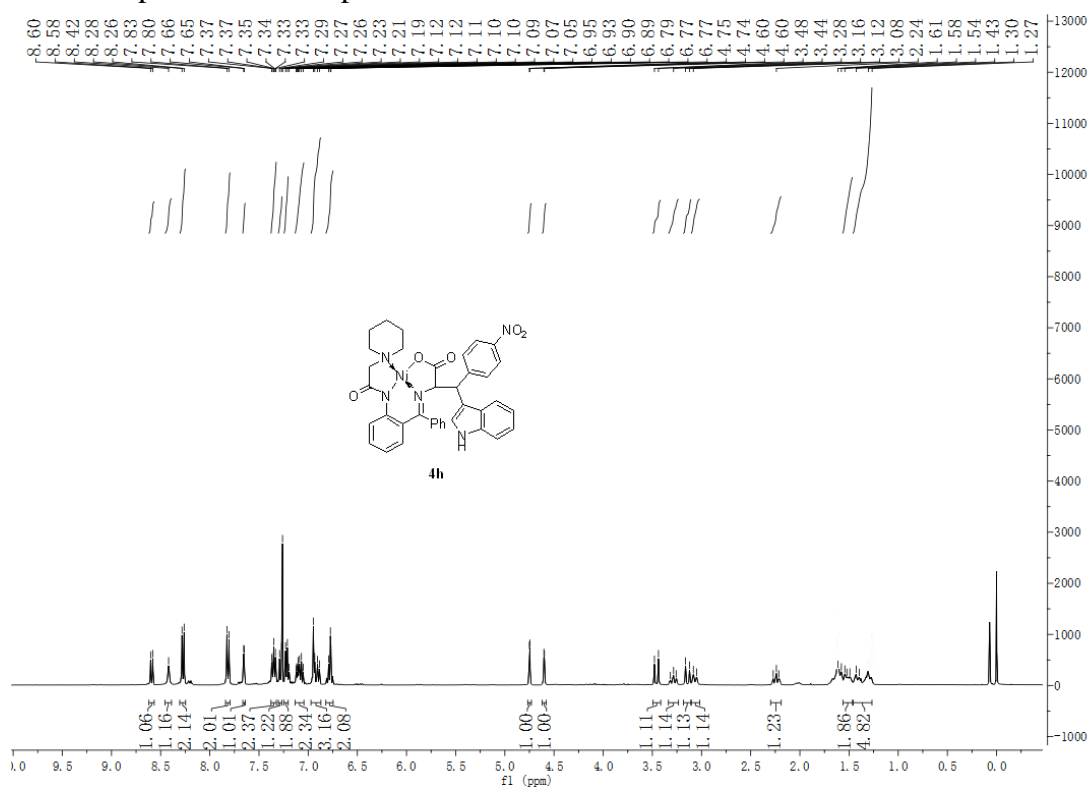

<sup>13</sup>C NMR spectrum of compound **4h**

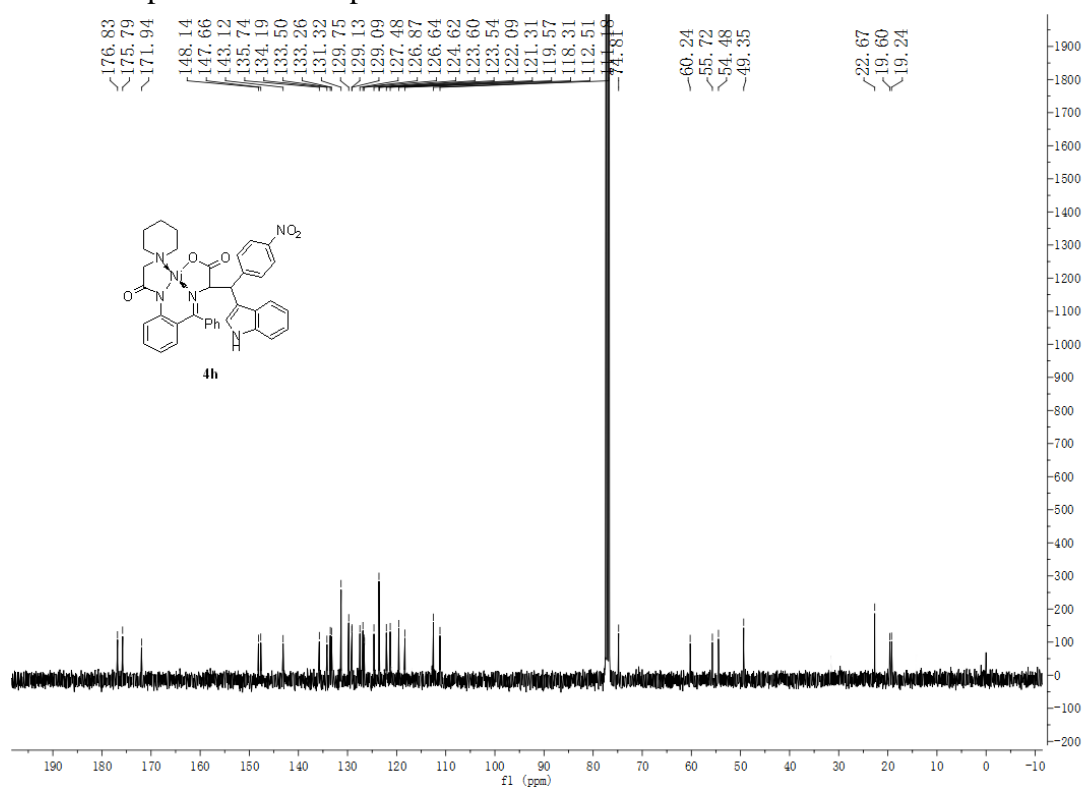

<sup>1</sup>H NMR spectrum of compound **4i**

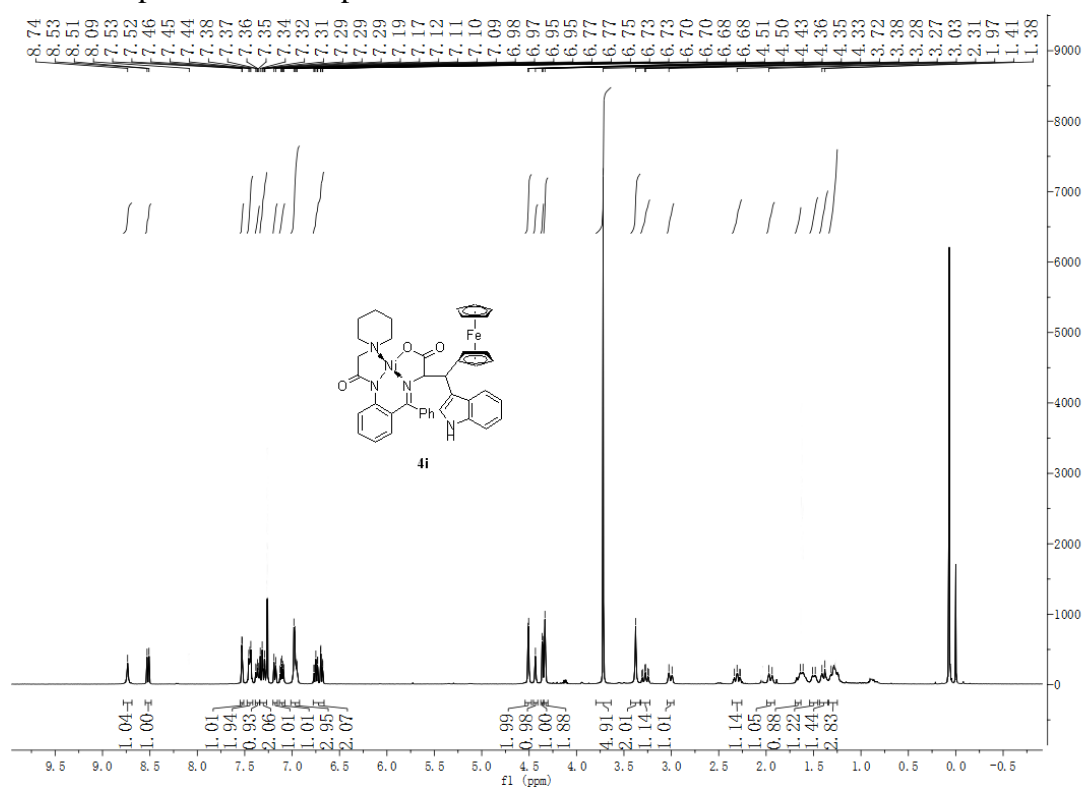

<sup>13</sup>C NMR spectrum of compound **4i**

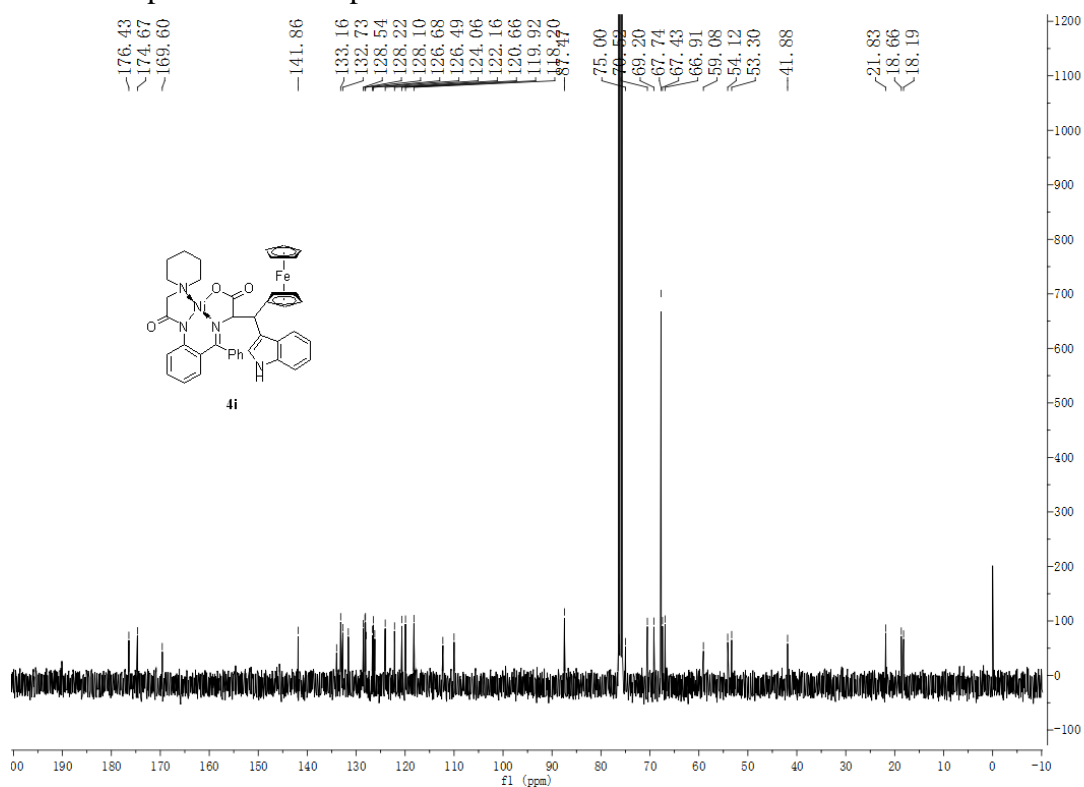

<sup>1</sup>H NMR spectrum of compound **4j**

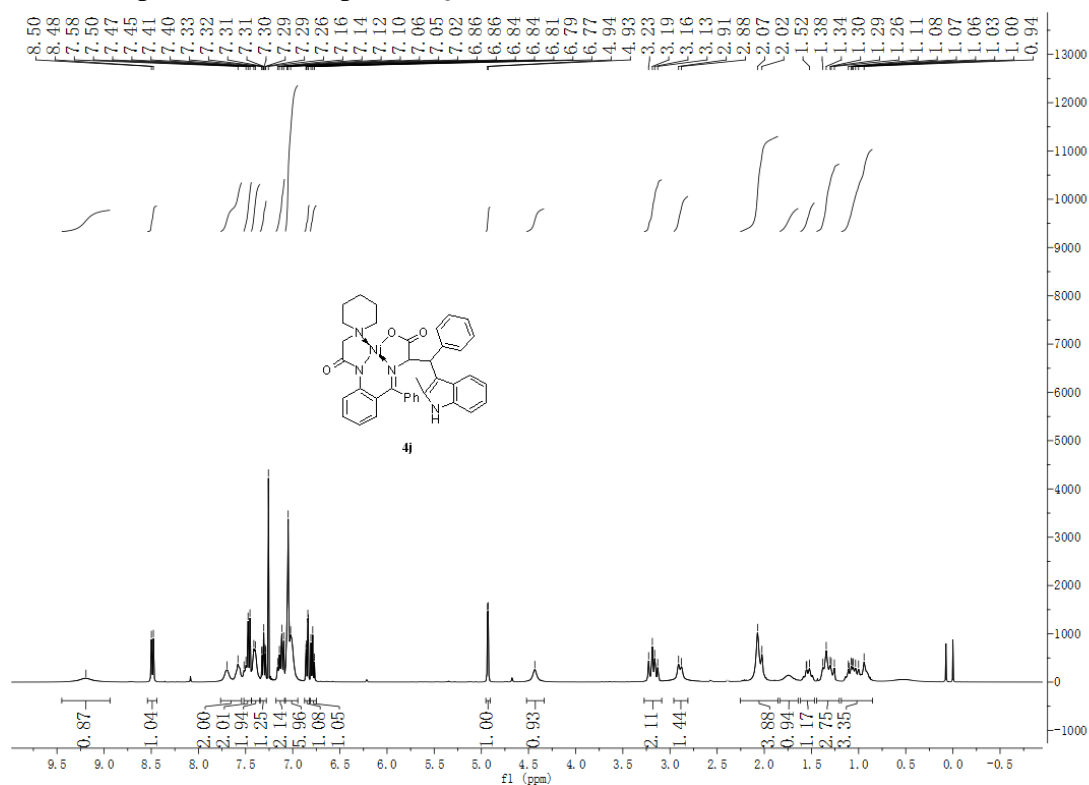

<sup>13</sup>C NMR spectrum of compound **4j**

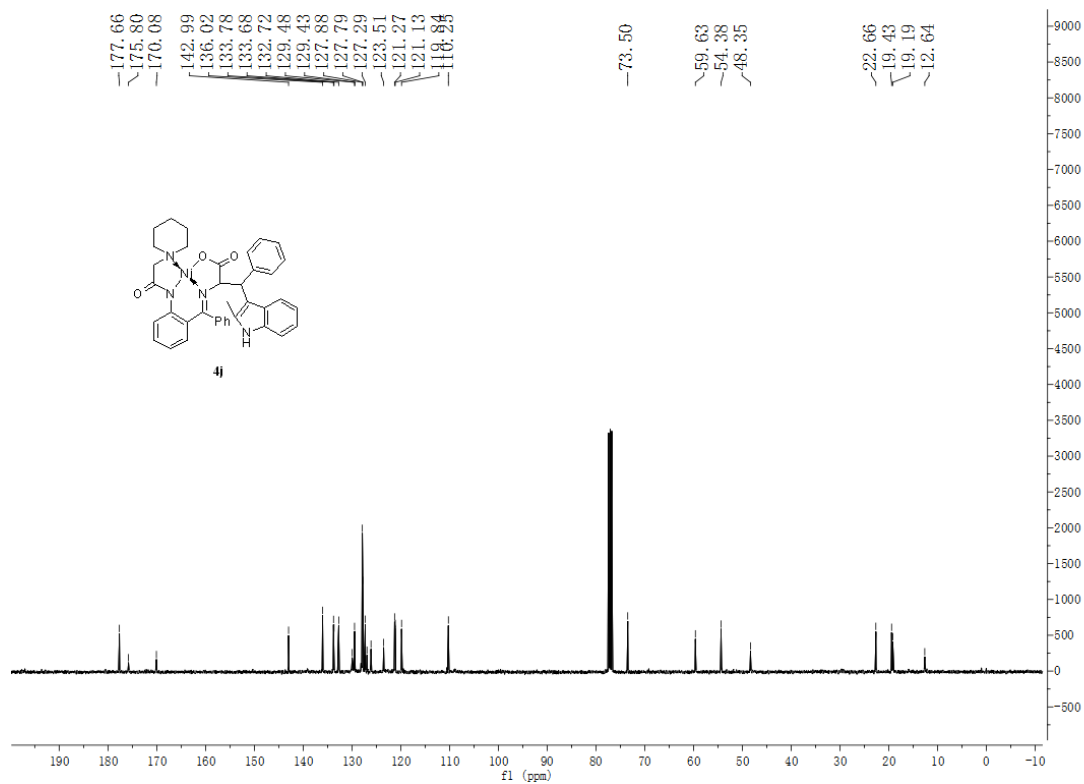

<sup>1</sup>H NMR spectrum of compound **4k**

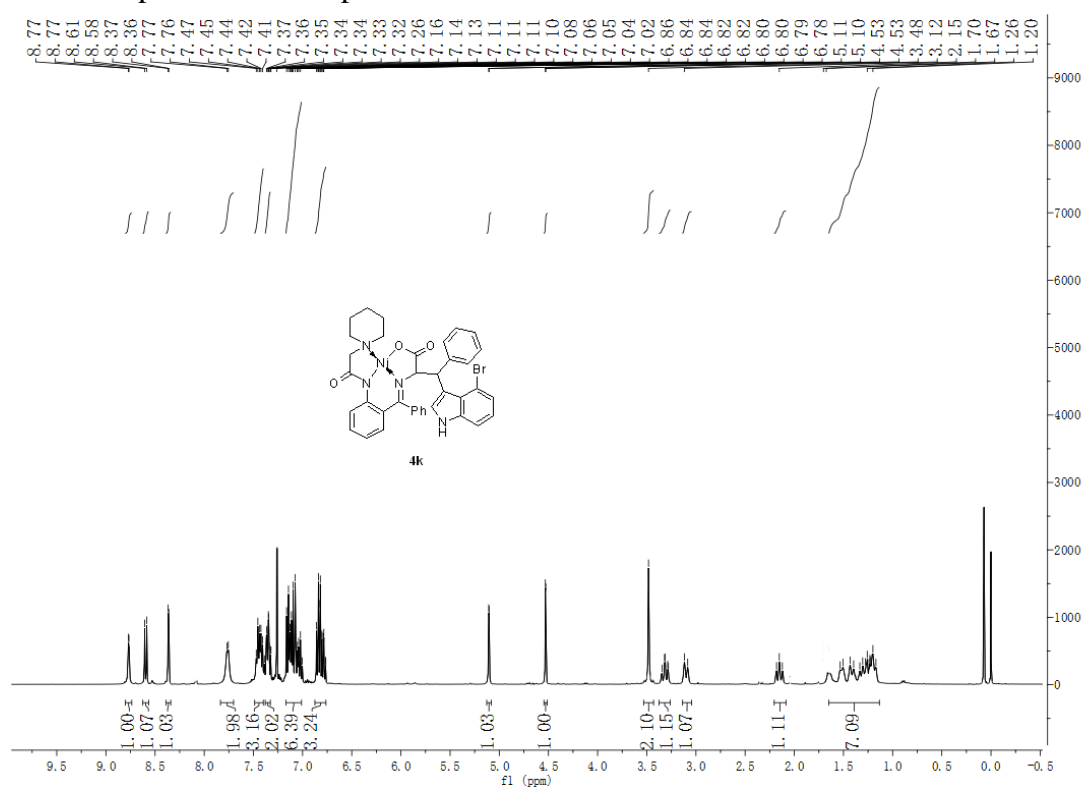

<sup>13</sup>C NMR spectrum of compound **4k**

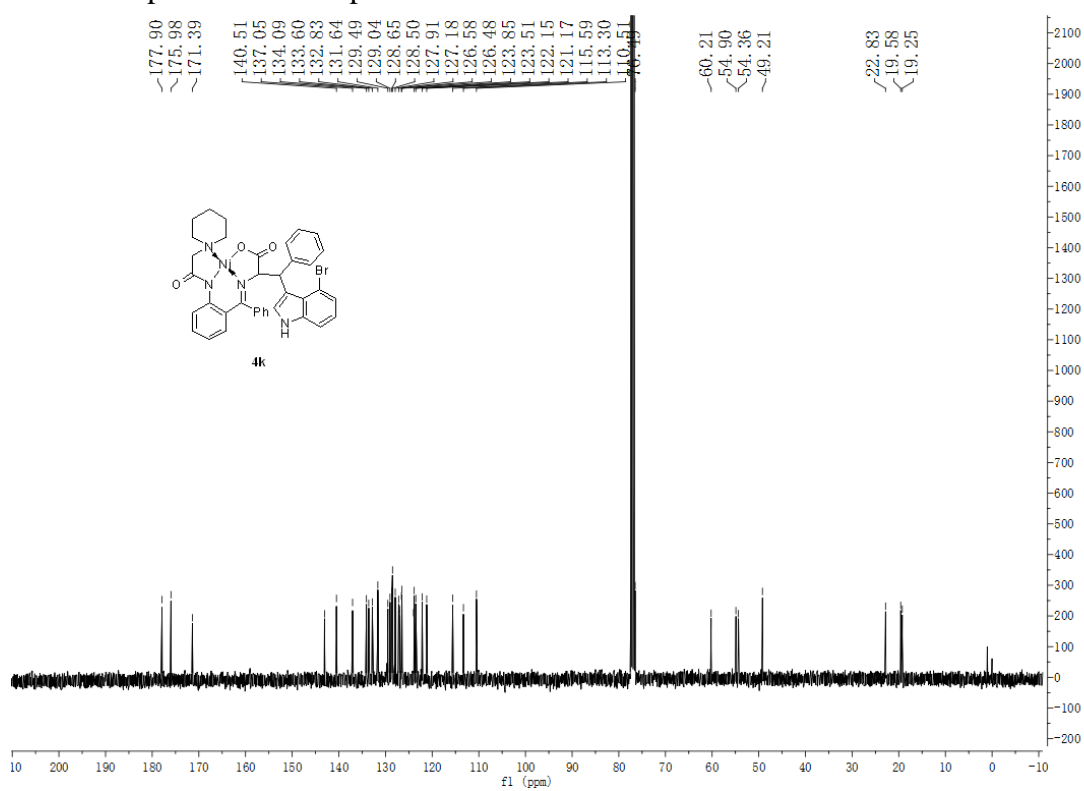

# <sup>1</sup>HNMR spectrum of compound **4l**

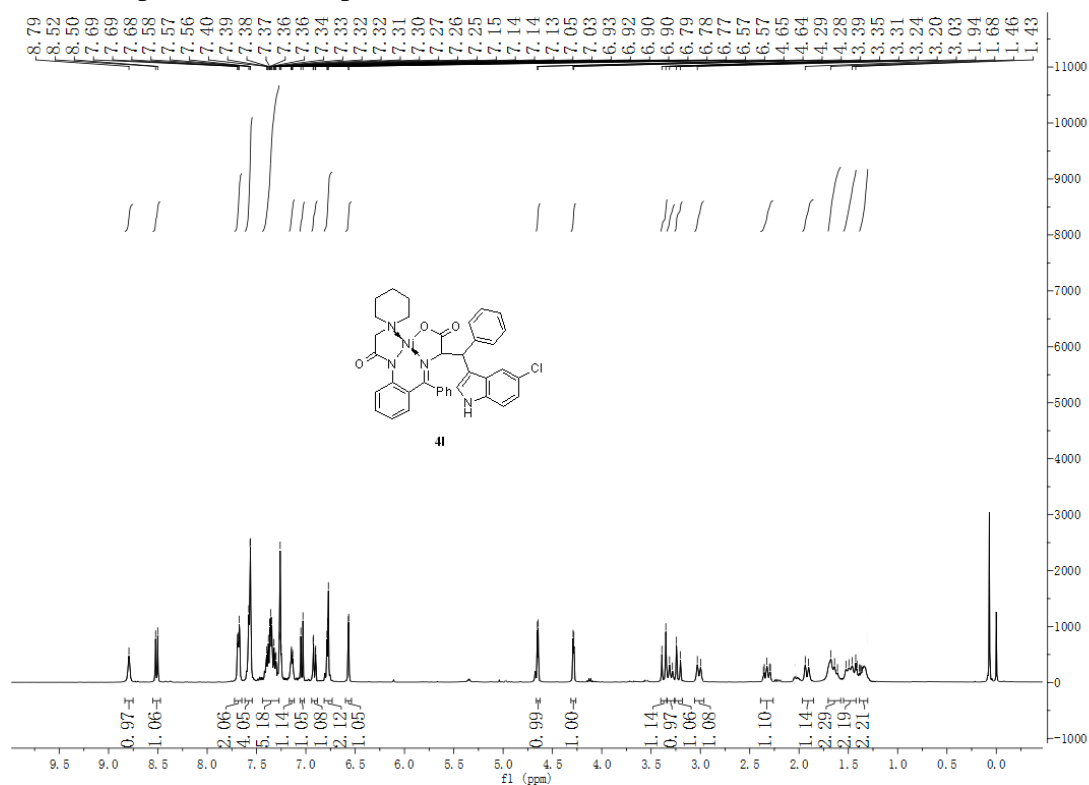

# <sup>13</sup>CNMR spectrum of compound **4l**

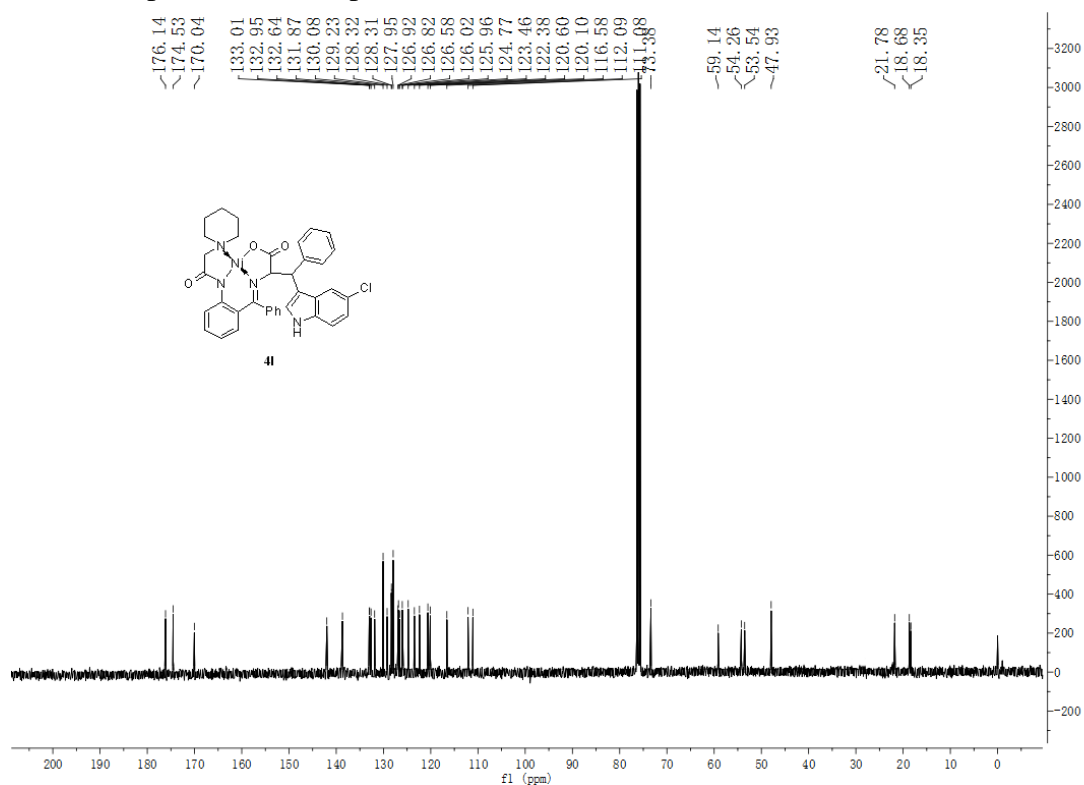

Chemical structure of **4m** is shown above the spectrum. The structure is a complex molecule featuring a piperidine ring, a benzodioxole system, a phenyl group, and a fluorinated benzimidazole moiety.

<sup>1</sup>H NMR spectrum (CDCl<sub>3</sub>) of compound **4m**. The x-axis represents the chemical shift in ppm (f1), ranging from 0.0 to 10.0. The y-axis represents the intensity. The spectrum shows several peaks, with integrations provided below the baseline.

Peak list (ppm) and integration values:

| Chemical Shift (ppm) | Integration |
|----------------------|-------------|
| 9.01                 | 0.99        |
| 8.53                 | 1.06        |
| 8.51                 |             |
| 7.65                 |             |
| 7.64                 |             |
| 7.63                 |             |
| 7.53                 |             |
| 7.52                 |             |
| 7.51                 |             |
| 7.41                 |             |
| 7.39                 |             |
| 7.37                 |             |
| 7.34                 |             |
| 7.33                 |             |
| 7.32                 |             |
| 7.31                 |             |
| 7.30                 |             |
| 7.29                 |             |
| 7.27                 |             |
| 7.26                 |             |
| 7.08                 |             |
| 7.06                 |             |
| 6.86                 |             |
| 6.86                 |             |
| 6.84                 |             |
| 6.83                 |             |
| 6.78                 |             |
| 6.77                 |             |
| 6.77                 |             |
| 6.56                 |             |
| 6.56                 |             |
| 6.54                 |             |
| 6.53                 |             |
| 6.44                 |             |
| 6.43                 |             |
| 6.42                 |             |
| 6.41                 |             |
| 4.70                 |             |
| 4.69                 |             |
| 4.32                 |             |
| 4.32                 |             |
| 4.32                 |             |
| 3.40                 |             |
| 3.36                 |             |
| 3.31                 |             |
| 3.25                 |             |
| 3.21                 |             |
| 3.03                 |             |
| 1.90                 |             |
| 1.43                 |             |
| 1.33                 |             |

Chemical structure of **4m** is shown above the spectrum.

<sup>13</sup>C NMR peaks (ppm):

- 176.18
- 174.59
- 169.97
- 141.97
- 138.96
- 132.96
- 132.72
- 131.85
- 130.10
- 128.80
- 128.28
- 128.21
- 127.88
- 126.81
- 126.18
- 125.96
- 122.36
- 120.10
- 96.51
- 96.26
- 73.55
- 59.13
- 54.26
- 53.53
- 48.51
- 21.77
- 18.60
- 18.34



<sup>1</sup>HNMR spectrum of compound **4n**

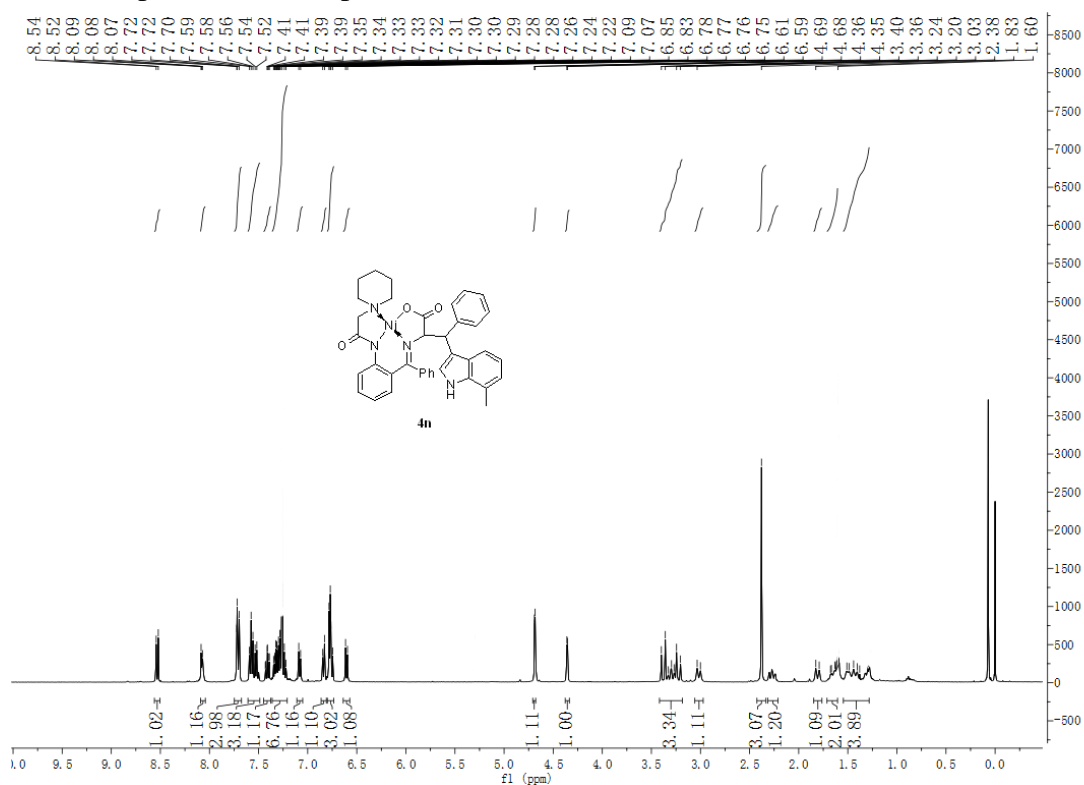

<sup>13</sup>CNMR spectrum of compound **4n**

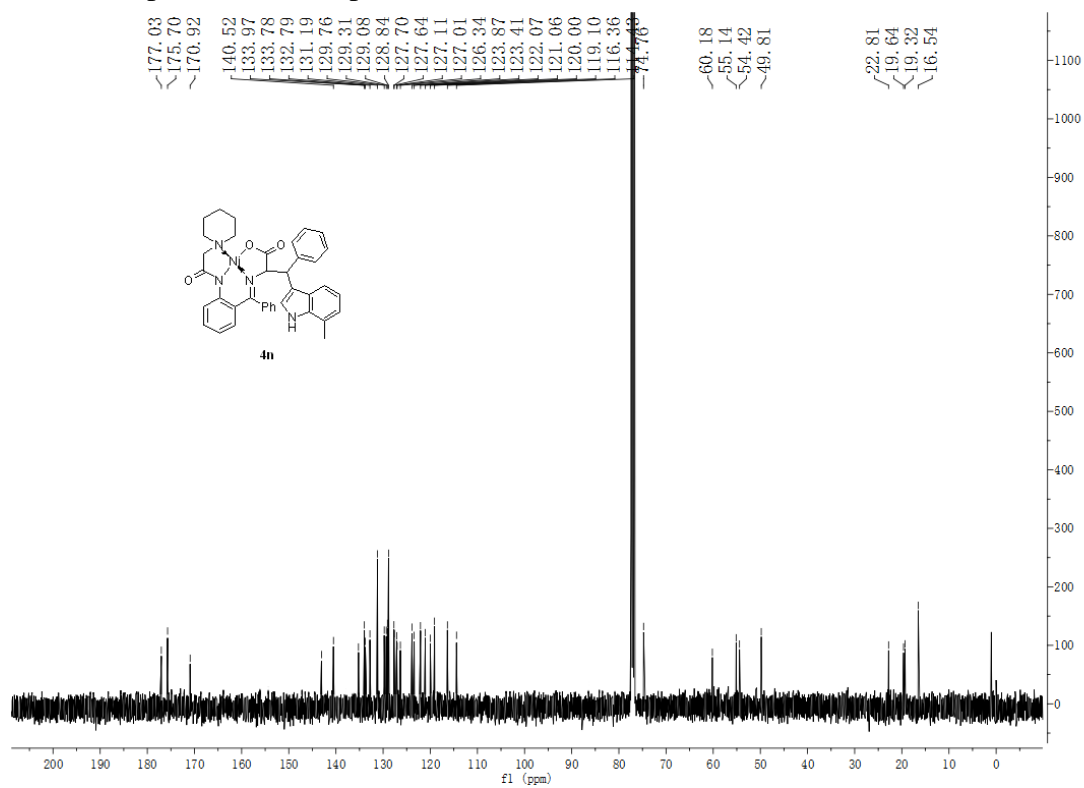

<sup>1</sup>H NMR spectrum of compound **5a**

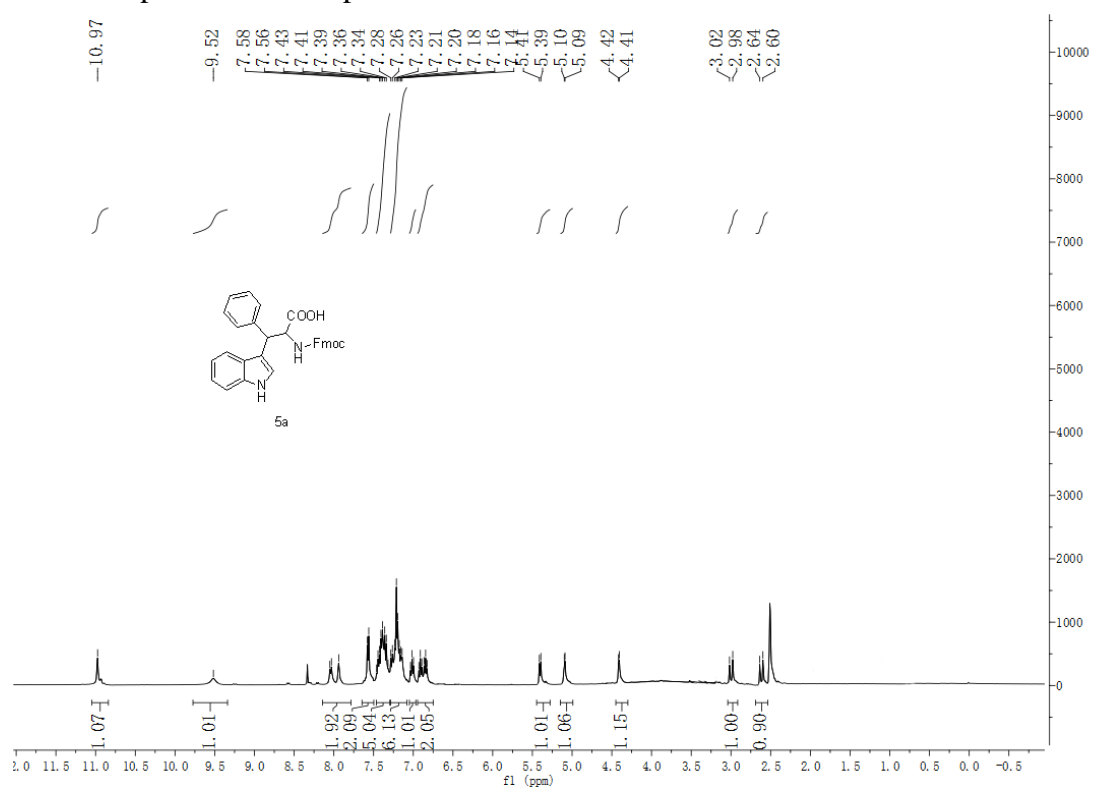

Supplement: s1 [file s1]
